# Supplementary material for: The Impact of Excluding Patients with End-Stage Knee Disease in Intra-Articular Hyaluronic Acid Trials: A Systematic Review and Meta-Analysis
Source: PubMed Central journal article supplement — Adv Ther. 2018 Dec 1;36(1):147–61. doi: 10.1007/s12325-018-0847-1 (PMC6318255; doi:10.1007/s12325-018-0847-1), 2018-12-01
Supplement: 12325_2018_847_MOESM1_ESM.pdf [file 12325_2018_847_MOESM1_ESM.pdf]

## Search Strategy

| MEDLINE and EMBASE                                                                                                                                                                                                                                                                                                                                                                                                                                                                                                                                                                             | PubMed                                                                                                                                                                                                                                                                                                                                                                                                                                                                                                                                                                                         |
|------------------------------------------------------------------------------------------------------------------------------------------------------------------------------------------------------------------------------------------------------------------------------------------------------------------------------------------------------------------------------------------------------------------------------------------------------------------------------------------------------------------------------------------------------------------------------------------------|------------------------------------------------------------------------------------------------------------------------------------------------------------------------------------------------------------------------------------------------------------------------------------------------------------------------------------------------------------------------------------------------------------------------------------------------------------------------------------------------------------------------------------------------------------------------------------------------|
| <ol style="list-style-type: none"> <li>1. Hyaluronic acid[title]</li> <li>2. Hylan[title]</li> <li>3. Hyaluronan[title]</li> <li>4. Viscosupplementation[title]</li> <li>5. Osteoarthritis.mp</li> <li>6. Knee.mp</li> <li>7. 1 or 2 or 3 or 4</li> <li>8. 5 and 6</li> <li>9. 7 and 8</li> <li>10. Euflexxa.mp</li> <li>11. Synvisc\$.mp</li> <li>12. Supartz.mp</li> <li>13. Orthovisc.mp</li> <li>14. Durolane.mp</li> <li>15. Hyalgan.mp</li> <li>16. 10 or 11 or 12 or 13 or 14 or 15</li> <li>17. 9 or 16</li> <li>18. Randomiz\$ adj3 Control\$ Trial</li> <li>19. 17 and 19</li> </ol> | <ol style="list-style-type: none"> <li>1. Hyaluronic acid[title]</li> <li>2. Hylan[title]</li> <li>3. Hyaluronan[title]</li> <li>4. Viscosupplementation[title]</li> <li>5. Osteoarthritis.mp</li> <li>6. Knee.mp</li> <li>7. 1 or 2 or 3 or 4</li> <li>8. 5 and 6</li> <li>9. 7 and 8</li> <li>10. Euflexxa.mp</li> <li>11. Synvisc\$.mp</li> <li>12. Supartz.mp</li> <li>13. Orthovisc.mp</li> <li>14. Durolane.mp</li> <li>15. Hyalgan.mp</li> <li>16. 10 or 11 or 12 or 13 or 14 or 15</li> <li>17. 9 or 16</li> <li>18. Randomiz\$ adj3 Control\$ Trial</li> <li>19. 17 and 19</li> </ol> |
